# Supplementary material for: Cytotoxic T cells specific for alpha-myosin drive immunotherapy related myocarditis
Source: Research Square preprint supplement (doi:10.21203/rs.3.rs-1315661/v1), 2022-02-04
Supplement: Supplementary file 1 [file 70ee0e204aad46a1b032592b.xlsx]

## Sheet: Sheet1
Seq #	Peptide start	Peptide end	Peptide	Percentile rank	Allele
1	190	198	RVIQYFASI	0.01	H-2-Kb
1	113	120	MIYTYSGL	0.01	H-2-Kb
1	650	660	SALHRENLNKL	0.02	H-2-Db
1	644	652	SSFQTVSAL	0.03	H-2-Kb
1	613	621	SSLKLMATL	0.04	H-2-Db
1	282	290	RNYHIFYQI	0.04	H-2-Kb
1	191	198	VIQYFASI	0.04	H-2-Kb
1	764	771	KVFFKAGL	0.05	H-2-Kb
1	824	832	MGVKNWPWM	0.06	H-2-Db
1	322	330	ASIDDSEEL	0.06	H-2-Db
1	827	834	KNWPWMKL	0.06	H-2-Kb
1	613	621	SSLKLMATL	0.06	H-2-Kb
1	1759	1767	KAITDAAMM	0.07	H-2-Db
1	644	652	SSFQTVSAL	0.07	H-2-Db
1	1242	1250	KAKANLEKV	0.07	H-2-Db
1	730	738	AAIPEGQFI	0.08	H-2-Db
1	684	692	GVMDNPLVM	0.08	H-2-Db
1	479	486	INFTNEKL	0.08	H-2-Kb
1	909	917	QLIKNKIQL	0.09	H-2-Db
1	1893	1901	TNLSKFRKV	0.11	H-2-Kb
1	421	428	VYYSIGAL	0.12	H-2-Kb
1	356	363	AIMHYGNM	0.12	H-2-Kb
1	148	157	SEAPPHIFSI	0.13	H-2-Db
1	1890	1898	QANTNLSKF	0.13	H-2-Db
1	155	165	FSISDNAYQYM	0.14	H-2-Db
1	279	287	KAERNYHIF	0.14	H-2-Db
1	311	319	YAFVSQGEV	0.14	H-2-Db
1	487	495	QQFFNHHMF	0.16	H-2-Db
1	149	157	EAPPHIFSI	0.17	H-2-Db
1	113	121	MIYTYSGLF	0.17	H-2-Kb
1	243	251	SRFGKFIRI	0.18	H-2-Kb
1	649	657	VSALHRENL	0.18	H-2-Kb
1	282	291	RNYHIFYQIL	0.18	H-2-Kb
1	724	732	YRILNPAAI	0.19	H-2-Db
1	487	497	QQFFNHHMFVL	0.2	H-2-Db
1	335	342	SAFDVLSF	0.2	H-2-Kb
1	765	772	VFFKAGLL	0.2	H-2-Kb
1	147	157	RSEAPPHIFSI	0.21	H-2-Db
1	1520	1528	EGGKNVHEL	0.21	H-2-Db
1	666	674	TTHPHFVRC	0.21	H-2-Kb
1	431	439	SVYEKMFNW	0.21	H-2-Kb
1	650	657	SALHRENL	0.21	H-2-Kb
1	1587	1595	QAKRNHLRM	0.22	H-2-Db
1	682	692	APGVMDNPLVM	0.22	H-2-Db
1	1563	1570	AQLEFNQI	0.22	H-2-Kb
1	418	425	VQQVYYSI	0.22	H-2-Kb
1	1674	1682	AIVERRNNL	0.23	H-2-Kb
1	881	891	SLLQEKNDLQL	0.24	H-2-Db
1	681	690	KAPGVMDNPL	0.24	H-2-Db
1	260	268	ASADIETYL	0.25	H-2-Db
1	1791	1799	TIKDLQHRL	0.25	H-2-Kb
1	454	461	RQYFIGVL	0.25	H-2-Kb
1	1490	1500	YEESLEHLETF	0.26	H-2-Db
1	284	291	YHIFYQIL	0.26	H-2-Kb
1	764	772	KVFFKAGLL	0.26	H-2-Kb
1	420	428	QVYYSIGAL	0.26	H-2-Kb
1	834	841	LYFKIKPL	0.29	H-2-Kb
1	355	363	GAIMHYGNM	0.29	H-2-Kb
1	76	84	VMQQNPPKF	0.3	H-2-Db
1	487	494	QQFFNHHM	0.3	H-2-Kb
1	125	133	VNPYKWLPV	0.3	H-2-Kb
1	1291	1299	RQLEEKEAL	0.31	H-2-Db
1	657	664	LNKLMTNL	0.31	H-2-Kb
1	320	330	SVASIDDSEEL	0.32	H-2-Db
1	1207	1215	EQIDNLQRV	0.32	H-2-Db
1	834	842	LYFKIKPLL	0.32	H-2-Kb
1	271	278	KSRVIFQL	0.32	H-2-Kb
1	545	553	SDMTFKAKL	0.32	H-2-Kb
1	1492	1500	ESLEHLETF	0.33	H-2-Db
1	384	391	KSAYLMGL	0.33	H-2-Kb
1	437	444	FNWMVTRI	0.35	H-2-Kb
1	1861	1869	KNLMRLQDL	0.35	H-2-Kb
1	1257	1265	QANEYRVKL	0.35	H-2-Kb
1	157	165	ISDNAYQYM	0.37	H-2-Kb
1	417	425	SVQQVYYSI	0.37	H-2-Kb
1	490	497	FNHHMFVL	0.37	H-2-Kb
1	833	841	KLYFKIKPL	0.39	H-2-Kb
1	123	131	VTVNPYKWL	0.39	H-2-Kb
1	441	448	VTRINATL	0.39	H-2-Kb
1	883	891	LQEKNDLQL	0.4	H-2-Db
1	1409	1416	VNAKCSSL	0.41	H-2-Kb
1	261	269	SADIETYLL	0.42	H-2-Db
1	1484	1494	FKLKNAYEESL	0.42	H-2-Db
1	322	331	ASIDDSEELL	0.43	H-2-Db
1	1239	1247	QIIKAKANL	0.43	H-2-Kb
1	79	87	QNPPKFDKI	0.43	H-2-Kb
1	649	657	VSALHRENL	0.44	H-2-Db
1	607	615	VGLYQKSSL	0.44	H-2-Kb
1	467	474	EIFDFNSF	0.44	H-2-Kb
1	431	440	SVYEKMFNWM	0.44	H-2-Kb
1	562	570	NNFQKPRNV	0.44	H-2-Kb
1	355	363	GAIMHYGNM	0.45	H-2-Db
1	288	298	YQILSNKKPEL	0.45	H-2-Db
1	487	496	QQFFNHHMFV	0.46	H-2-Db
1	93	101	LTFLHEPAV	0.46	H-2-Kb
1	823	832	FMGVKNWPWM	0.47	H-2-Db
1	1655	1663	TQLQLDDAV	0.47	H-2-Db
1	242	251	SSRFGKFIRI	0.47	H-2-Kb
1	1258	1265	ANEYRVKL	0.48	H-2-Kb
1	1240	1247	IIKAKANL	0.48	H-2-Kb
1	920	928	KVKEMTERL	0.49	H-2-Kb
1	1479	1486	LSTELFKL	0.5	H-2-Kb
1	614	621	SLKLMATL	0.5	H-2-Kb
1	592	602	MGWLEKNKDPL	0.51	H-2-Db
1	971	980	HATENKVKNL	0.51	H-2-Db
1	1783	1792	RMKKNMEQTI	0.51	H-2-Db
1	388	396	LMGLNSADL	0.52	H-2-Db
1	229	237	EAFGNAKTV	0.52	H-2-Db
1	594	602	WLEKNKDPL	0.52	H-2-Db
1	149	157	EAPPHIFSI	0.52	H-2-Kb
1	1831	1839	EQKRNAESV	0.53	H-2-Db
1	156	165	SISDNAYQYM	0.53	H-2-Db
1	389	397	MGLNSADLL	0.53	H-2-Db
1	227	237	ALEAFGNAKTV	0.53	H-2-Db
1	164	174	YMLTDRENQSI	0.54	H-2-Db
1	1223	1230	KSEFKLEL	0.54	H-2-Kb
1	321	330	VASIDDSEEL	0.56	H-2-Db
1	1544	1553	SALEEAEASL	0.56	H-2-Db
1	311	321	YAFVSQGEVSV	0.57	H-2-Db
1	487	495	QQFFNHHMF	0.57	H-2-Kb
1	251	259	IHFGATGKL	0.57	H-2-Kb
1	816	824	IQWNIRAFM	0.59	H-2-Kb
1	488	496	QFFNHHMFV	0.59	H-2-Kb
1	999	1009	KALQEAHQQAL	0.6	H-2-Db
1	816	824	IQWNIRAFM	0.6	H-2-Db
1	1109	1117	KLKENQARI	0.6	H-2-Db
1	709	716	KGFPNRIL	0.6	H-2-Kb
1	1446	1454	KKQRNFDKI	0.61	H-2-Db
1	816	823	IQWNIRAF	0.62	H-2-Kb
1	283	291	NYHIFYQIL	0.62	H-2-Kb
1	1379	1388	TDAIQRTEEL	0.64	H-2-Db
1	124	131	TVNPYKWL	0.64	H-2-Kb
1	687	695	DNPLVMHQL	0.64	H-2-Kb
1	768	778	KAGLLGLLEEM	0.66	H-2-Db
1	289	299	QILSNKKPELL	0.66	H-2-Db
1	709	717	KGFPNRILY	0.67	H-2-Db
1	487	494	QQFFNHHM	0.68	H-2-Db
1	1643	1652	KHLKNSQAHL	0.68	H-2-Db
1	599	607	KDPLNETVV	0.69	H-2-Db
1	486	494	LQQFFNHHM	0.69	H-2-Kb
1	532	540	MSILEEECM	0.7	H-2-Db
1	69	77	VTIKEDQVM	0.7	H-2-Db
1	1201	1209	SVAELGEQI	0.71	H-2-Db
1	1380	1388	DAIQRTEEL	0.72	H-2-Db
1	1488	1497	NAYEESLEHL	0.72	H-2-Db
1	190	198	RVIQYFASI	0.72	H-2-Db
1	1649	1657	QAHLKDTQL	0.72	H-2-Db
1	1723	1732	TSLINQKKKM	0.72	H-2-Db
1	1437	1444	SNAAAAAL	0.72	H-2-Kb
1	597	607	KNKDPLNETVV	0.73	H-2-Db
1	1328	1335	KNALAHAL	0.73	H-2-Kb
1	1675	1682	IVERRNNL	0.73	H-2-Kb
1	1757	1767	AKKAITDAAMM	0.75	H-2-Db
1	642	649	KGSSFQTV	0.75	H-2-Kb
1	479	489	INFTNEKLQQF	0.76	H-2-Kb
1	550	558	KAKLYDNHL	0.76	H-2-Kb
1	1764	1771	AAMMAEEL	0.77	H-2-Db
1	645	652	SFQTVSAL	0.78	H-2-Kb
1	244	251	RFGKFIRI	0.79	H-2-Kb
1	514	522	FGMDLQACI	0.8	H-2-Db
1	763	771	TKVFFKAGL	0.8	H-2-Kb
1	544	553	ASDMTFKAKL	0.8	H-2-Kb
1	426	436	GALAKSVYEKM	0.81	H-2-Db
1	1830	1839	AEQKRNAESV	0.82	H-2-Db
1	1562	1570	RAQLEFNQI	0.82	H-2-Db
1	1519	1528	GEGGKNVHEL	0.83	H-2-Db
1	824	834	MGVKNWPWMKL	0.84	H-2-Db
1	157	165	ISDNAYQYM	0.85	H-2-Db
1	488	495	QFFNHHMF	0.85	H-2-Kb
1	769	778	AGLLGLLEEM	0.86	H-2-Db
1	282	290	RNYHIFYQI	0.87	H-2-Db
1	485	495	KLQQFFNHHMF	0.88	H-2-Db
1	1157	1165	GATSVQIEM	0.89	H-2-Db
1	467	477	EIFDFNSFEQL	0.89	H-2-Kb
1	822	832	AFMGVKNWPWM	0.9	H-2-Db
1	332	340	ATDSAFDVL	0.9	H-2-Db
1	469	477	FDFNSFEQL	0.9	H-2-Db
1	428	436	LAKSVYEKM	0.91	H-2-Kb
1	651	660	ALHRENLNKL	0.92	H-2-Db
1	1102	1110	LALQLQKKL	0.94	H-2-Kb
1	667	674	THPHFVRC	0.94	H-2-Kb
1	260	268	ASADIETYL	0.94	H-2-Kb
1	644	651	SSFQTVSA	0.95	H-2-Kb
1	1679	1687	RNNLLQAEL	0.95	H-2-Kb
1	267	275	YLLEKSRVI	0.96	H-2-Db
1	283	290	NYHIFYQI	0.96	H-2-Kb
1	468	477	IFDFNSFEQL	0.97	H-2-Kb
1	1551	1561	ASLEHEEGKIL	0.98	H-2-Db
1	1301	1308	SQLTRGKL	0.98	H-2-Kb
1	1102	1110	LALQLQKKL	0.99	H-2-Db
1	667	675	THPHFVRCI	0.99	H-2-Kb
