# Supplementary material for: Cytotoxic T cells specific for alpha-myosin drive immunotherapy related myocarditis
Source: Research Square preprint supplement (doi:10.21203/rs.3.rs-1315661/v1), 2022-02-04
Supplement: Supplementary file 3 [file f2230955df3a856edae1d0ed.xlsx]

## Sheet: Sheet1
Name	Sequence
peptide_1	MTDAQMADFGAAAQYLRKSE
peptide_2	LRKSEKERLEAQTRPFDIRT
peptide_3	FDIRTECFVPDDKEEYVKAK
peptide_4	YVKAKVVSREGGKVTAETEN
peptide_5	AETENGKTVTIKEDQVMQQN
peptide_6	VMQQNPPKFDKIEDMAMLTF
peptide_7	AMLTFLHEPAVLYNLKERYA
peptide_9	FCVTVNPYKWLPVYNAEVVA
peptide_10	AEVVAAYRGKKRSEAPPHIF
peptide_11	PPHIFSISDNAYQYMLTDRE
peptide_12	LTDRENQSILITGESGAGKT
peptide_13	GAGKTVNTKRVIQYFASIAA
peptide_14	ASIAAIGDRSKKENPNANKG
peptide_15	NANKGTLEDQIIQANPALEA
peptide_16	PALEAFGNAKTVRNDNSSRF
peptide_17	NSSRFGKFIRIHFGATGKLA
peptide_18	TGKLASADIETYLLEKSRVI
peptide_20	IFYQILSNKKPELLDMLLVT
peptide_21	MLLVTNNPYDYAFVSQGEVS
peptide_23	LATDSAFDVLSFTAEEKAGV
peptide_24	EKAGVYKLTGAIMHYGNMKF
peptide_25	GNMKFKQKQREEQAEPDGTE
peptide_26	PDGTEDADKSAYLMGLNSAD
peptide_27	LNSADLLKGLCHPRVKVGNE
peptide_28	KVGNEYVTKGQSVQQVYYSI
peptide_29	VYYSIGALAKSVYEKMFNWM
peptide_30	MFNWMVTRINATLETKQPRQ
peptide_31	KQPRQYFIGVLDIAGFEIFD
peptide_32	FEIFDFNSFEQLCINFTNEK
peptide_33	FTNEKLQQFFNHHMFVLEQE
peptide_34	VLEQEEYKKEGIEWEFIDFG
peptide_35	FIDFGMDLQACIDLIEKPMG
peptide_36	EKPMGIMSILEEECMFPKAS
peptide_37	FPKASDMTFKAKLYDNHLGK
peptide_38	NHLGKSNNFQKPRNVKGKQE
peptide_39	KGKQEAHFSLVHYAGTVDYN
peptide_40	TVDYNIMGWLEKNKDPLNET
peptide_41	PLNETVVGLYQKSSLKLMAT
peptide_42	KLMATLFSTYASADTGDSGK
peptide_43	GDSGKGKGGKKKGSSFQTVS
peptide_44	FQTVSALHRENLNKLMTNLK
peptide_45	MTNLKTTHPHFVRCIIPNER
peptide_46	IPNERKAPGVMDNPLVMHQL
peptide_47	VMHQLRCNGVLEGIRICRKG
peptide_48	ICRKGFPNRILYGDFRQRYR
peptide_49	RQRYRILNPAAIPEGQFIDS
peptide_50	QFIDSRKGAEKLLGSLDIDH
peptide_51	LDIDHNQYKFGHTKVFFKAG
peptide_52	FFKAGLLGLLEEMRDERLSR
peptide_53	ERLSRIITRIQAQARGQLMR
peptide_54	GQLMRIEFKKIVERRDALLV
peptide_56	VKNWPWMKLYFKIKPLLKSA
peptide_57	LLKSAETEKEMANMKEEFGR
peptide_58	EEFGRVKDALEKSEARRKEL
peptide_59	RRKELEEKMVSLLQEKNDLQ
peptide_60	KNDLQLQVQAEQDNLNDAEE
peptide_61	NDAEERCDQLIKNKIQLEAK
peptide_62	QLEAKVKEMTERLEDEEEMN
peptide_63	EEEMNAELTAKKRKLEDECS
peptide_64	EDECSELKKDIDDLELTLAK
peptide_65	LTLAKVEKEKHATENKVKNL
peptide_66	KVKNLTEEMAGLDEIIAKLT
peptide_67	IAKLTKEKKALQEAHQQALD
peptide_68	QQALDDLQAEEDKVNTLTKS
peptide_69	TLTKSKVKLEQQVDDLEGSL
peptide_70	LEGSLEQEKKVRMDLERAKR
peptide_71	ERAKRKLEGDLKLTQESIMD
peptide_72	ESIMDLENDKLQLEEKLKKK
peptide_73	KLKKKEFDISQQNSKIEDEQ
peptide_74	IEDEQALALQLQKKLKENQA
peptide_75	KENQARIEELEEELEAERTA
peptide_76	AERTARAKVEKLRSDLSREL
peptide_77	LSRELEEISERLEEAGGATS
peptide_78	GGATSVQIEMNKKREAEFQK
peptide_79	AEFQKMRRDLEEATLQHEAT
peptide_80	QHEATAAALRKKHADSVAEL
peptide_81	SVAELGEQIDNLQRVKQKLE
peptide_82	KQKLEKEKSEFKLELDDVTS
peptide_83	DDVTSNMEQIIKAKANLEKV
peptide_84	NLEKVSRTLEDQANEYRVKL
peptide_85	YRVKLEEAQRSLNDFTTQRA
peptide_86	TTQRAKLQTENGELARQLEE
peptide_87	RQLEEKEALISQLTRGKLSY
peptide_88	GKLSYTQQMEDLKRQLEEEG
peptide_89	LEEEGKAKNALAHALQSSRH
peptide_90	QSSRHDCDLLREQYEEEMEA
peptide_91	EEMEAKAELQRVLSKANSEV
peptide_92	ANSEVAQWRTKYETDAIQRT
peptide_93	AIQRTEELEEAKKKLAQRLQ
peptide_94	AQRLQDAEEAVEAVNAKCSS
peptide_95	AKCSSLEKTKHRLQNEIEDL
peptide_96	EIEDLMVDVERSNAAAAALD
peptide_97	AAALDKKQRNFDKILAEWKQ
peptide_98	AEWKQKYEESQSELESSQKE
peptide_99	SSQKEARSLSTELFKLKNAY
peptide_100	LKNAYEESLEHLETFKRENK
peptide_101	KRENKNLQEEISDLTEQLGE
peptide_102	EQLGEGGKNVHELEKIRKQL
peptide_103	IRKQLEVEKLELQSALEEAE
peptide_104	LEEAEASLEHEEGKILRAQL
peptide_105	LRAQLEFNQIKAEIERKLAE
peptide_106	RKLAEKDEEMEQAKRNHLRM
peptide_108	ETRSRNEALRVKKKMEGDLN
peptide_109	EGDLNEMEIQLSQANRIASE
peptide_110	RIASEAQKHLKNSQAHLKDT
peptide_111	HLKDTQLQLDDAVHANDDLK
peptide_112	NDDLKENIAIVERRNNLLQA
peptide_113	NLLQAELEELRAVVEQTERS
peptide_114	QTERSRKLAEQELIETSERV
peptide_115	TSERVQLLHSQNTSLINQKK
peptide_116	INQKKKMESDLTQLQTEVEE
peptide_117	TEVEEAVQECRNAEEKAKKA
peptide_118	KAKKAITDAAMMAEELKKEQ
peptide_119	LKKEQDTSAHLERMKKNMEQ
peptide_120	KNMEQTIKDLQHRLDEAEQI
peptide_121	EAEQIALKGGKKQLQKLEAR
peptide_122	KLEARVRELENELEAEQKRN
peptide_123	EQKRNAESVKGMRKSERRIK
peptide_124	ERRIKELTYQTEEDKKNLMR
peptide_125	KNLMRLQDLVDKLQLKVKAY
peptide_126	KVKAYKRQAEEAEEQANTNL
peptide_127	ANTNLSKFRKVQHELDEAEE
peptide_128	DEAEERADIAESQVNKLRAK
peptide_129	KLRAKSRDIGAKKMHDEE
19A	KSRVIFQLKA
19B	FQLKAERNYH
19C	ERNYHIFYQI
55A	DALLVIQWNI
55B	IQWNIRAFMG
55C	RAFMGVKNWP
