# Supplementary material for: Cytotoxic T cells specific for alpha-myosin drive immunotherapy related myocarditis
Source: Research Square preprint supplement (doi:10.21203/rs.3.rs-1315661/v1), 2022-02-04
Supplement: Supplementary file 4 [file aa04d0fd45330058758b3635.docx]

Supplemental Material: Full TCR sequences

**TCR-A**5’ GGG – restriction enzyme site for BglII – alpha chain – 2A – Beta Chain- stop codon – restriction site for SalI- GGG 3’

GGGAGATCTATGAAATCCTTGAGTGTTTCCCTAGTGGTCCTGTGGCTCCAGTTAAACTGGGTGAACAGCCAGCAGAAGGTGCAGCAGAGCCCAGAATCCCTCATTGTCCCAGAGGGAGCCATGACCTCTCTCAACTGCACTTTCAGCGACAGTGCTTCTCAGTATTTTGCATGGTACAGACAGCATTCTGGGAAAGCCCCCAAGGCACTGATGTCCATCTTCTCCAATGGTGAAAAAGAAGAAGGCAGATTCACAATTCACCTCAATAAAGCCAGTCTGCATTTCTCCCTGCACATCAGAGACTCCCAGCCCAGTGACTCTGCTCTCTACCTCTGTGCAGTGAGCGATAGAGGTTCAGCCTTAGGGAGGCTGCATTTTGGAGCTGGGACTCAGCTGATTGTCATACCTGACATCCAGAACCCAGAACCTGCTGTGTACCAGTTAAAAGATCCTCGGTCTCAGGACAGCACCCTCTGCCTGTTCACCGACTTTGACTCCCAAATCAATGTGCCGAAAACCATGGAATCTGGAACGTTCATCACTGACAAAACTGTGCTGGACATGAAAGCTATGGATTCCAAGAGCAATGGGGCCATTGCCTGGAGCAACCAGACAAGCTTCACCTGCCAAGATATCTTCAAAGAGACCAACGCCACCTACCCCAGTTCAGACGTTCCCTGTGATGCCACGTTGACTGAGAAAAGCTTTGAAACAGATATGAACCTAAACTTTCAAAACCTGTCAGTTATGGGACTCCGAATCCTCCTGCTGAAAGTAGCCGGATTTAACCTGCTCATGACGCTGAGGCTGTGGTCCTCCGGAgagggcagaggaagtctgctaacatgcggtgacgtcgaggagaatcctggcccaATGTGGCAGTTTTGCATTCTGTGCCTCTGTGTACTCATGGCTTCTGTGGCTACAGACCCCACAGTGACTTTGCTGGAGCAAAACCCAAGGTGGCGTCTGGTACCACGTGGTCAAGCTGTGAACCTACGCTGCATCTTGAAGAATTCCCAGTATCCCTGGATGAGCTGGTATCAGCAGGATCTCCAAAAGCAACTACAGTGGCTGTTCACTCTGCGGAGTCCTGGGGACAAAGAGGTCAAATCTCTTCCCGGTGCTGATTACCTGGCCACACGGGTCACTGATACGGAGCTGAGGCTGCAAGTGGCCAACATGAGCCAGGGCAGAACCTTGTACTGCACCTGCAGTGCAGCCTGGGGCGGCAGTGCAGAAACGCTGTATTTTGGCTCAGGAACCAGACTGACTGTTCTCGAGGATCTGAGAAATGTGACTCCACCCAAGGTCTCCTTGTTTGAGCCATCAAAAGCAGAGATTGCAAACAAACAAAAGGCTACCCTCGTGTGCTTGGCCAGGGGCTTCTTCCCTGACCACGTGGAGCTGAGCTGGTGGGTGAATGGCAAGGAGGTCCACAGTGGGGTCAGCACGGACCCTCAGGCCTACAAGGAGAGCAATTATAGCTACTGCCTGAGCAGCCGCCTGAGGGTCTCTGCTACCTTCTGGCACAATCCTCGAAACCACTTCCGCTGCCAAGTGCAGTTCCATGGGCTTTCAGAGGAGGACAAGTGGCCAGAGGGCTCACCCAAACCTGTCACACAGAACATCAGTGCAGAGGCCTGGGGCCGAGCAGACTGTGGAATCACTTCAGCATCCTATCATCAGGGGGTTCTGTCTGCAACCATCCTCTATGAGATCCTACTGGGGAAGGCCACCCTATATGCTGTGCTGGTCAGTGGCCTAGTGCTGATGGCCATGGTCAAGAAAAAAAATTCCTAGGTCGACGGG

**TCR-B**

5’ GGG – restriction enzyme site for BglII- restriction site for PmeI – Kozak- alpha chain – SG 2A – Beta Chain- stop codon – restriction site for SalI- restriction site for BamHI - GGG 3’

GGGAGATCTGTTTAAACGCCGCCACCATGAACAGGCTGCTGTGCTCTCTGCTGGGGCTTCTGTGCACCCAGGTTTGCTGGGTGAAAGGACAGCAAGTGCAGCAGAGCCCCGCGTCCTTGGTTCTGCAGGAGGGGGAGAATGCAGAGCTGCAGTGTAACTTTTCCACATCTTTGAACAGTATGCAGTGGTTTTACCAACGTCCTGAGGGAAGTCTCGTCAGCCTGTTCTACAATCCTTCTGGGACAAAGCAGAGTGGGAGACTGACATCCACAACAGTCATCAAAGAACGTCGCAGCTCTTTGCACATTTCCTCCTCCCAGATCACAGACTCAGGCACTTATCTCTGTGCTCTGGAGAGGGCCTCTGGCAGCTGGCAACTCATCTTTGGATCTGGAACCCAACTGACAGTTATGCCTGACATCCAGAACCCAGAACCTGCTGTGTACCAGTTAAAAGATCCTCGGTCTCAGGACAGCACCCTCTGCCTGTTCACCGACTTTGACTCCCAAATCAATGTGCCGAAAACCATGGAATCTGGAACGTTCATCACTGACAAAACTGTGCTGGACATGAAAGCTATGGATTCCAAGAGCAATGGGGCCATTGCCTGGAGCAACCAGACAAGCTTCACCTGCCAAGATATCTTCAAAGAGACCAACGCCACCTACCCCAGTTCAGACGTTCCCTGTGATGCCACGTTGACTGAGAAAAGCTTTGAAACAGATATGAACCTAAACTTTCAAAACCTGTCAGTTATGGGACTCCGAATCCTCCTGCTGAAAGTAGCCGGATTTAACCTGCTCATGACGCTGAGGCTGTGGTCCAGTTCCGGAgagggcagaggaagtctgctaacatgcggtgacgtcgaggagaatcctggcccaATGGGCATCCAGACCCTCTGTTGTGTGATCTTTTATGTTCTGATAGCAAATCACACAGATGCTGGAGTTACCCAGACACCCAGACATGAGGTGGCAGAGAAAGGACAAACAATAATCCTGAAGTGTGAGCCAGTTTCAGGCCACAATGACCTTTTCTGGTACAGACAGACCAAGATACAGGGACTAGAGTTGCTGAGCTACTTCCGCAGCAAGTCTCTTATGGAAGATGGTGGGGCTTTCAAGGATCGATTCAAAGCTGAGATGCTAAATTCATCCTTCTCCACTCTGAAGATTCAACCTACAGAACCCAAGGACTCAGCTGTGTATCTGTGTGCCAGCAGTCTGAGGAGGGGCGAACAGTACTTCGGTCCCGGCACCAGGCTCACGGTTTTAGAGGATCTGAGAAATGTGACTCCACCCAAGGTCTCCTTGTTTGAGCCATCAAAAGCAGAGATTGCAAACAAACAAAAGGCTACCCTCGTGTGCTTGGCCAGGGGCTTCTTCCCTGACCACGTGGAGCTGAGCTGGTGGGTGAATGGCAAGGAGGTCCACAGTGGGGTCAGCACGGACCCTCAGGCCTACAAGGAGAGCAATTATAGCTACTGCCTGAGCAGCCGCCTGAGGGTCTCTGCTACCTTCTGGCACAATCCTCGAAACCACTTCCGCTGCCAAGTGCAGTTCCATGGGCTTTCAGAGGAGGACAAGTGGCCAGAGGGCTCACCCAAACCTGTCACACAGAACATCAGTGCAGAGGCCTGGGGCCGAGCAGACTGTGGAATCACTTCAGCATCCTATCATCAGGGGGTTCTGTCTGCAACCATCCTCTATGAGATCCTACTGGGGAAGGCCACCCTATATGCTGTGCTGGTCAGTGGCCTAGTGCTGATGGCCATGGTCAAGAAAAAAAATTCCTAGGTCGACGGATCCGGG

**TCR-C**

5’ GGG – restriction enzyme site for BglII- restriction site for PmeI – Kozak- alpha chain – SG 2A – Beta Chain- stop codon – restriction site for SalI- restriction site for BamHI - GGG 3’

GGGAGATCTGTTTAAACGCCGCCACCATGGACTTTTCTCCAGGCTTCGTGGCTGTGATACTTCTCATACTTGGAAGGACCCACGGAGATTCCGTGACTCAAACAGAAGGCCAAGTGACCGTCTCAGAAAGCAAGTCCCTGATAATAAATTGCACGTATTCAGCCACAAGCATAGCTTACCCTAATCTTTTCTGGTATGTTCGATATCCTGGAGAAGGTCTACAACTCCTCCTGAAAGTCATTACGGCTGGCCAGAAGGGAAGCAGCAGAGGGTTTGAAGCCACATACAATAAAGAAACCACCTCCTTCCACTTGCAGAAAGCCTCAGTGCAAGAGTCAGACTCGGCTGTGTACTACTGTGCTCTGGGCGACAGGAATAATGCAGGTGCCAAGCTCACATTCGGAGGGGGAACAAGGTTAACGGTCAGACCCGACATCCAGAACCCAGAACCTGCTGTGTACCAGTTAAAAGATCCTCGGTCTCAGGACAGCACCCTCTGCCTGTTCACCGACTTTGACTCCCAAATCAATGTGCCGAAAACCATGGAATCTGGAACGTTCATCACTGACAAAACTGTGCTGGACATGAAAGCTATGGATTCCAAGAGCAATGGGGCCATTGCCTGGAGCAACCAGACAAGCTTCACCTGCCAAGATATCTTCAAAGAGACCAACGCCACCTACCCCAGTTCAGACGTTCCCTGTGATGCCACGTTGACTGAGAAAAGCTTTGAAACAGATATGAACCTAAACTTTCAAAACCTGTCAGTTATGGGACTCCGAATCCTCCTGCTGAAAGTAGCCGGATTTAACCTGCTCATGACGCTGAGGCTGTGGTCCAGTTCCGGAgagggcagaggaagtctgctaacatgcggtgacgtcgaggagaatcctggcccaATGTCTAACACTGCCTTCCCTGACCCCGCCTGGAACACCACCCTGCTATCTTGGGTTGCTCTCTTTCTCCTGGGAACAAGTTCAGCAAATTCTGGGGTTGTCCAGTCTCCAAGATACATAATCAAAGGAAAGGGAGAAAGGTCCATTCTAAAATGTATTCCCATCTCTGGACATCTCTCTGTGGCCTGGTATCAACAGACTCAGGGGCAGGAACTAAAGTTCTTCATTCAGCATTATGATAAAATGGAGAGAGATAAAGGAAACCTGCCCAGCAGATTCTCAGTCCAACAGTTTGATGACTATCACTCTGAGATGAACATGAGTGCCTTGGAGCTAGAGGACTCTGCCGTGTACTTCTGTGCCAGCTCTCTGGGCGGCACCGTGCAAGACACCCAGTACTTTGGGCCAGGCACTCGGCTCCTCGTGTTAGAGGATCTGAGAAATGTGACTCCACCCAAGGTCTCCTTGTTTGAGCCATCAAAAGCAGAGATTGCAAACAAACAAAAGGCTACCCTCGTGTGCTTGGCCAGGGGCTTCTTCCCTGACCACGTGGAGCTGAGCTGGTGGGTGAATGGCAAGGAGGTCCACAGTGGGGTCAGCACGGACCCTCAGGCCTACAAGGAGAGCAATTATAGCTACTGCCTGAGCAGCCGCCTGAGGGTCTCTGCTACCTTCTGGCACAATCCTCGAAACCACTTCCGCTGCCAAGTGCAGTTCCATGGGCTTTCAGAGGAGGACAAGTGGCCAGAGGGCTCACCCAAACCTGTCACACAGAACATCAGTGCAGAGGCCTGGGGCCGAGCAGACTGTGGAATCACTTCAGCATCCTATCATCAGGGGGTTCTGTCTGCAACCATCCTCTATGAGATCCTACTGGGGAAGGCCACCCTATATGCTGTGCTGGTCAGTGGCCTAGTGCTGATGGCCATGGTCAAGAAAAAAAATTCCTAGGTCGACGGATCCGGG
